# Supplementary material for: Toward Chemical Accuracy Using the Jastrow Correlated Antisymmetrized Geminal Power Ansatz
Source: PubMed Central journal article supplement (PMC10134432; doi:10.1021/acs.jctc.2c01141), 2023-04-04
Supplement: ct2c01141_si_001.pdf [file ct2c01141_si_001.pdf]

# Supplementary Information

## 1 Computed total energies using various *ansatz*

Total energies of atoms and molecules computed using various *ansatz* are listed in the tables below. For, molecules the geometry references are also provided.

Table S1: Total energies [Ha] for atoms

| Element | DMC-JsAGPs   | DMC-JDFFT    | VMC-JsAGPs   | DMC-JHF <sup>+</sup> | Est. exact* |
|---------|--------------|--------------|--------------|----------------------|-------------|
| Li      | -7.47815(7)  | -7.4779(2)   | -7.47777(6)  | -7.47802(6)          | -7.4781     |
| C       | -37.8371(2)  | -37.8305(3)  | -37.8255(2)  | -37.8302(3)          | -37.8450    |
| N       | -54.5785(4)  | -54.5765(3)  | -54.5614(1)  | -54.5766(2)          | -54.5892    |
| O       | -75.0550(3)  | -75.0521(2)  | -75.0331(2)  | -75.0525(2)          | -75.0673    |
| F       | -99.7199(3)  | -99.7179(2)  | -99.6920(2)  | -99.7181(2)          | -99.7339    |
| Na      | -162.2424(3) | -162.2415(3) | -162.2146(2) | -162.2397(2)         | -162.2546   |
| Si      | -289.3344(3) | -289.3293(3) | -289.2817(2) | -289.3276(4)         | -289.3590   |
| P       | -341.2262(3) | -341.2251(3) | -341.1740(2) | -341.2225(6)         | -341.2590   |
| S       | -398.0709(3) | -398.0653(9) | -398.0065(2) | -398.0659(4)         | -398.1100   |
| Cl      | -460.1050(2) | -460.0999(4) | -460.0365(2) | -460.0949(4)         | -460.1480   |

Table S2: Total energies [Ha] for molecules

| species_list                  | Geometry | DMC-JsAGPs    | DMC-JDFFT    | VMC-JsAGPs    | DMC-JHF <sup>+</sup> | Est. exact* |
|-------------------------------|----------|---------------|--------------|---------------|----------------------|-------------|
| LiH                           | a        | -8.0699(3)    | -8.070(1)    | -8.06945(7)   | -8.0704(2)           | -8.070529   |
| BeH                           | a        | -15.2467(5)   | -15.2454(2)  | -15.2445(2)   | -15.2460(2)          | -15.246761  |
| Li <sub>2</sub>               | a        | -14.9937(3)   | -14.9905(7)  | -14.9932(2)   | -14.9917(2)          | -14.995084  |
| CH                            | a        | -38.4724(3)   | -38.4632(3)  | -38.4603(3)   | -38.4638(3)          | -38.478863  |
| CH <sub>2</sub> _singlet      | a        | -39.1280(3)   | -39.1173(4)  | -39.11534(7)  | -39.1189(3)          | -39.133920  |
| CH <sub>2</sub> _triplet      | a        | -39.1420(3)   | -39.1401(4)  | -39.1271(2)   | -39.1413(2)          | -39.149059  |
| NH                            | a        | -55.2104(3)   | -55.2078(2)  | -55.1929(1)   | -55.2085(3)          | -55.222744  |
| CH <sub>3</sub>               | a        | -39.8276(3)   | -39.8273(3)  | -39.8101(1)   | -39.8277(2)          | -39.835829  |
| NH <sub>2</sub>               | a        | -55.8698(3)   | -55.8652(2)  | -55.8517(1)   | -55.8671(3)          | -55.879554  |
| OH                            | a        | -75.7248(1)   | -75.7204(5)  | -75.7033(2)   | -75.7222(3)          | -75.737497  |
| CH <sub>4</sub>               | a        | -40.5086(2)   | -40.5072(4)  | -40.49311(8)  | -40.5075(3)          | -40.515269  |
| H <sub>2</sub> O              | a        | -76.4270(2)   | -76.4225(5)  | -76.4052(2)   | -76.4240(3)          | -76.439167  |
| HF                            | a        | -100.4478(3)  | -100.4422(5) | -100.4230(2)  | -100.4439(3)         | -100.459713 |
| NH <sub>3</sub>               | a        | -56.5539(2)   | -56.5495(4)  | -56.53521(9)  | -56.5525(3)          | -56.564731  |
| LiF                           | a        | -107.4214(3)  | -107.4187(3) | -107.3991(2)  | -107.4187(2)         | -107.434307 |
| CN                            | b        | -92.6950(3)   | -92.6881(3)  | -92.6556(1)   | -92.6891(4)          | -92.722961  |
| C <sub>2</sub> H <sub>2</sub> | a        | -77.3175(3)   | -77.3137(3)  | -77.2862(2)   | -77.3137(4)          | -77.332381  |
| CO                            | b        | -113.3038(3)  | -113.2937(3) | -113.2676(2)  | -113.2930(4)         | -113.326318 |
| HCN                           | a        | -93.4107(3)   | -93.4023(3)  | -93.3777(2)   | -93.4048(4)          | -93.431085  |
| N <sub>2</sub>                | b        | -109.5165(3)  | -109.5068(3) | -109.4702(5)  | -109.5065(4)         | -109.542697 |
| HCO                           | a        | -113.8342(3)  | -113.8272(4) | -113.7954(2)  | -113.8278(4)         | -113.856915 |
| NO                            | b        | -129.8696(3)  | -129.8608(3) | -129.82208(8) | -129.8612(4)         | -129.900576 |
| C <sub>2</sub> H <sub>4</sub> | a        | -78.5735(2)   | -78.5676(4)  | -78.5427(2)   | -78.5672(4)          | -78.588951  |
| H <sub>2</sub> CO             | a        | -114.4876(3)  | -114.4802(3) | -114.4509(2)  | -114.4803(4)         | -114.509104 |
| O <sub>2</sub>                | b        | -150.2949(3)  | -150.2874(4) | -150.2483(2)  | -150.2898(4)         | -150.327203 |
| C <sub>2</sub> H <sub>6</sub> | a        | -79.8120(1)   | -79.8107(2)  | -79.7818(2)   | -79.8098(5)          | -79.826875  |
| F <sub>2</sub>                | a        | -199.4989(3)  | -199.4852(8) | -199.4449(2)  | -199.4868(4)         | -199.530110 |
| H <sub>2</sub> O <sub>2</sub> | a        | -151.53355(9) | -151.5257(2) | -151.4846(2)  | -151.5274(4)         | -151.564235 |
| H <sub>4</sub> CO             | a        | -115.7081(2)  | -115.7058(4) | -115.6710(2)  | -115.7066(4)         | -115.730774 |
| N <sub>2</sub> H <sub>4</sub> | a        | -111.8531(3)  | -111.8488(5) | -111.8146(2)  | -111.8502(5)         | -111.877672 |
| CO <sub>2</sub>               | b        | -188.5658(3)  | -188.5580(3) | -188.4982(2)  | -188.5537(6)         | -188.601471 |
| SiH <sub>2</sub> _singlet     | c        | -290.5836(4)  | -290.5739(5) | -290.5372(2)  | -290.5727(4)         | -290.601705 |
| SiH <sub>2</sub> _triplet     | a        | -290.5490(3)  | -290.5438(2) | -290.50460(9) | -290.5433(4)         | -290.568877 |
| PH <sub>2</sub>               | c        | -342.4759(4)  | -342.4674(3) | -342.4233(2)  | -342.4676(5)         | -342.503299 |
| SiH <sub>3</sub>              | a        | -291.2015(4)  | -291.1933(3) | -291.1556(2)  | -291.1947(4)         | -291.222022 |
| H <sub>2</sub> S              | a        | -399.3620(2)  | -399.3596(3) | -399.2930(2)  | -399.3575(4)         | -399.402426 |
| HCl                           | a        | -460.7743(2)  | -460.7673(2) | -460.7028(2)  | -460.7639(5)         | -460.819376 |
| PH <sub>3</sub>               | a        | -343.1141(3)  | -343.1098(2) | -343.0539(2)  | -343.1068(5)         | -343.147839 |
| SiH <sub>4</sub>              | a        | -291.8530(3)  | -291.8518(3) | -291.7936(2)  | -291.8506(5)         | -291.873733 |
| CS                            | a        | -436.1801(3)  | -436.1656(2) | -436.1024(2)  | -436.1620(6)         | -436.228940 |

Continued on next page

Table S2: Total energies [Ha] for molecules

| species_list                   | Geometry | DMC-JsAGPs   | DMC-JDFT     | VMC-JsAGPs   | DMC-JHF <sup>+</sup> | Est. exact* |
|--------------------------------|----------|--------------|--------------|--------------|----------------------|-------------|
| SiO                            | a        | -364.6950(3) | -364.6811(4) | -364.6225(2) | -364.6822(5)         | -364.733068 |
| SO                             | b        | -473.3246(8) | -473.3113(3) | -473.2348(2) | -473.3126(6)         | -473.378253 |
| ClO                            | b        | -535.2580(4) | -535.2449(4) | -535.1553(2) | -535.2422(6)         | -535.320350 |
| CH <sub>3</sub> Cl             | a        | -500.0746(5) | -500.0636(4) | -499.9848(2) | -500.0618(6)         | -500.123907 |
| ClF                            | a        | -559.9217(3) | -559.9080(5) | -559.8215(2) | -559.9057(6)         | -559.982138 |
| H <sub>4</sub> CS              | a        | -438.6654(3) | -438.6584(4) | -438.5790(2) | -438.6556(6)         | -438.711801 |
| HOCl                           | a        | -535.9203(3) | -535.9079(4) | -535.8239(2) | -535.9070(6)         | -535.979997 |
| SO <sub>2</sub>                | a        | -548.5908(3) | -548.5752(4) | -548.4945(2) | -548.5704(7)         | -548.658618 |
| Na <sub>2</sub>                | c        | -324.5103(4) | -324.5066(6) | -324.4556(2) | -324.5032(4)         | -324.536291 |
| NaCl                           | a        | -622.5069(4) | -622.4977(5) | -622.4105(2) | -622.4913(6)         | -622.560207 |
| Si <sub>2</sub>                | a        | -578.7899(3) | -578.7805(3) | -578.6889(2) | -578.7735(6)         | -578.838636 |
| P <sub>2</sub>                 | a        | -682.6364(4) | -682.6247(3) | -682.5193(2) | -682.6191(7)         | -682.704451 |
| S <sub>2</sub>                 | a        | -796.3076(4) | -796.2935(3) | -796.1822(2) | -796.2869(8)         | -796.384237 |
| Cl <sub>2</sub>                | a        | -920.3023(3) | -920.2878(6) | -920.1569(2) | -920.2803(6)         | -920.389991 |
| Si <sub>2</sub> H <sub>6</sub> | c        | -582.5298(5) | -582.5160(8) | -582.4238(2) | -582.5134(8)         | -582.566752 |

<sup>+</sup>Nemec *et al.*, J. Chem. Phys. 2010, 132, 034111

\*Bytautas *et al.*, J. Chem. Phys. 2005, 122, 154110

<sup>a</sup>Curtiss *et al.*, J. Chem. Phys. 1997, 106, 1063–1079

<sup>b</sup>Feller *et al.*, J. Chem. Phys. 2008, 129, 204105

<sup>c</sup>O'eill *et al.*, Mol. Phys. 2005, 103, 763-766
